# Supplementary material for: Structural basis of adaptor-mediated protein degradation by the tail-specific PDZ-protease Prc
Source: PubMed Central journal article supplement (PMC5686067; doi:10.1038/s41467-017-01697-9), 2017-11-15
Supplement: 41467_2017_1697_MOESM1_ESM.pdf [file 41467_2017_1697_MOESM1_ESM.pdf]

## SUPPLEMENTARY TABLE

**Supplementary Table 1: List of primer sequences used in the study.**

|                           |                                                           |
|---------------------------|-----------------------------------------------------------|
| sNlpI forward             | CATCATCACAGCAGCGGCGAGAATCTCTACTTCCAGGGTCATATGAGTAATACTTCC |
| sNlpI reverse             | GGAAGTATTACTCATATGACCCTGGAAGTAGAGATTCTCGCCGCTGCTGTGATGATG |
| sNlpI-ΔN forward          | TACTTCCAGGGTCATATGACTTTACAGCAGGAAGTG                      |
| sNlpI-ΔN reverse          | CACTTCCTGCTGTAAAGTCATATGACCCTGGAAGTA                      |
| N-6xHis-sMepS forward     | CTGACATATGTGTAGTGCAAATAAC                                 |
| N-6xHis-sMepS reverse     | TCAGCTCGAGTTAGCTGCGGCTGAGA                                |
| sMepS-6xHis-C forward     | GATCCATATGAGTGCAAATAACACCGCA                              |
| sMepS-6xHis-C reverse     | GATCCTCGAGTTAGTGGTGGTGGTGGTGGTGGCTGCGGCTGAGAACCCG         |
| Prc-noHis forward         | CAACCCGCTCCCGTCAAGTAATCTAGAGTCGACCTG                      |
| Prc-noHis reverse         | CAGGTCGACTCTAGATTACTTGACGGGAGCGGGTTG                      |
| Prc-ΔPDZ forward          | TGA GTT TGT CGC TGG AAT TCC TCG AAG ACC GCG CGG TTA A     |
| Prc-ΔPDZ reverse          | TTA ACC GCG CGG TCT TCG AGG AAT TCC AGC GAC AAA CTC A     |
| Prc-K308W forward         | GTGGTTGCCTTAATTTGGGGGCCGAAGGGCAGT                         |
| Prc-K308W reverse         | ACTGCCCTTCGGCCCCAAATTAAGGCAACCAC                          |
| Prc-L245A forward         | ACTGAAATGAGTTTGTGCGCTGAAGGTATTGGCGCAGTG                   |
| Prc-L245A reverse         | CACTGCGCCAATACCTTCAGCCGACAAACTCATTTTCAGT                  |
| Prc-L340G forward         | CGTGAACGTATTTCGTGGCGAAGACCGCGCGGTT                        |
| Prc-L340G reverse         | AACCGCGCGGTTCTTCGCCACGAATACGTTACAG                        |
| Prc-L340A forward         | CGTGAACGTATTTCGTGCTGAAGACCGCGCGGTT                        |
| Prc-L340A reverse         | AACCGCGCGGTTCTTCAGCACGAATACGTTACAG                        |
| sNlpI-D113A forward       | CAGGCAGGCAATTTTGGCGCTGCCTATGAAGCG                         |
| sNlpI-D113A reverse       | CGTTCATAGGCAGCCGCAAAATTGCCTGCCTG                          |
| sNlpI-E117A forward       | TTTGATGCTGCCTATGCGGCGTTTGATTCTGTA                         |
| sNlpI-E117A reverse       | TACAGAATCAAACGCCGCATAGGCAGCATCAAA                         |
| sNlpI-D120A forward       | GCCTATGAAGCGTTTTCGTCTGTACTTGAGCTT                         |
| sNlpI-D120A reverse       | AAGCTCAAGTACAGACGCAAACGCTTCATAGGC                         |
| sNlpI-E124A forward       | TTTGATTCTGTACTTGCGCTTGATCCAATTAC                          |
| sNlpI-E124A reverse       | GTAAGTTGGATCAAGCGCAAGTACAGAATCAAA                         |
| sNlpI-D113A/E117A forward | CAGGCAGGCAATTTTGGCGCTGCCTATGCGGCGTTTGATTCTGTA             |
| sNlpI-D113A/E117A reverse | TACAGAATCAAACGCCGCATAGGCAGCCGCAAAATTGCCTGCCTG             |
| sNlpI-QM forward          | GCCTATGCGGCGTTTTCGTCTGTACTTGCGCTTGATCCAATTAC              |
| sNlpI-QM reverse          | GTAAGTTGGATCAAGCGCAAGTACAGACGCAAACGCCGCATAGGC             |
| sNlpI-L38A forward        | GTACCATTGCAACCGACTGCACAGCAGGAAGTGATTCTG                   |

|                     |                                         |
|---------------------|-----------------------------------------|
| sNlpI-L38A reverse  | CAGAATCACTTCCTGCTGTGCAGTCGGTTGCAATGGTAC |
| sNlpI-L38C forward  | ACCATTGCAACCGACTTGCCAGCAGGAAGTGATTC     |
| sNlpI-L38C reverse  | GAATCACTTCCTGCTGGCAAGTCGGTTGCAATGGT     |
| sNlpI-R82E forward  | GGTCTGAGGGCATTAGCGGAAAACGATTTTTCGCAAGCG |
| sNlpI-R82E reverse  | CGCTTGCGAAAAATCGTTTTCCGCTAATGCCCTCAGACC |
| sNlpI-A114W forward | GCAGGCAATTTTGATTGGGCCTATGAAGCGTTT       |
| sNlpI-A114W reverse | AAACGCTTCATAGGCCCAATCAAAATTGCCTGC       |
| sNlpI-A114C forward | GCAGGCAATTTTGATTGTGCCTATGAAGCGTTT       |
| sNlpI-A114C reverse | AAACGCTTCATAGGCACAATCAAAATTGCCTGC       |

## SUPPLEMENTARY FIGURES

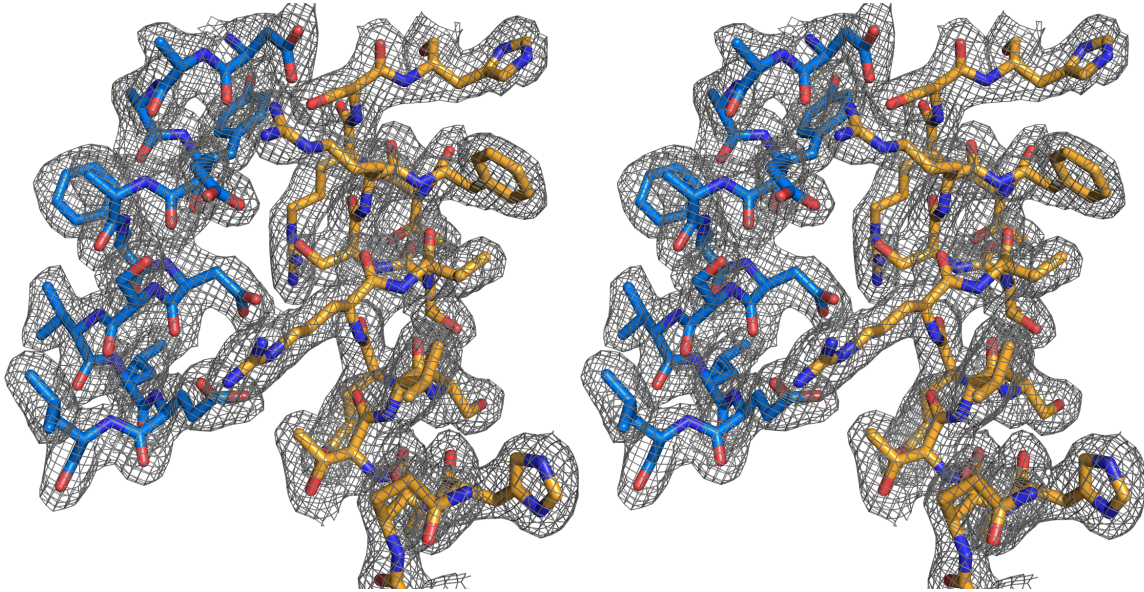

**Supplementary Figure 1: Stereo image of the electron density map of the binding interface between NlpI and Prc.** 2Fo-Fc electron density map contoured at 1.0  $\sigma$  level is shown around helix TPR2b (blue) of NlpI and helix h1 (orange) of Prc at the binding interface.

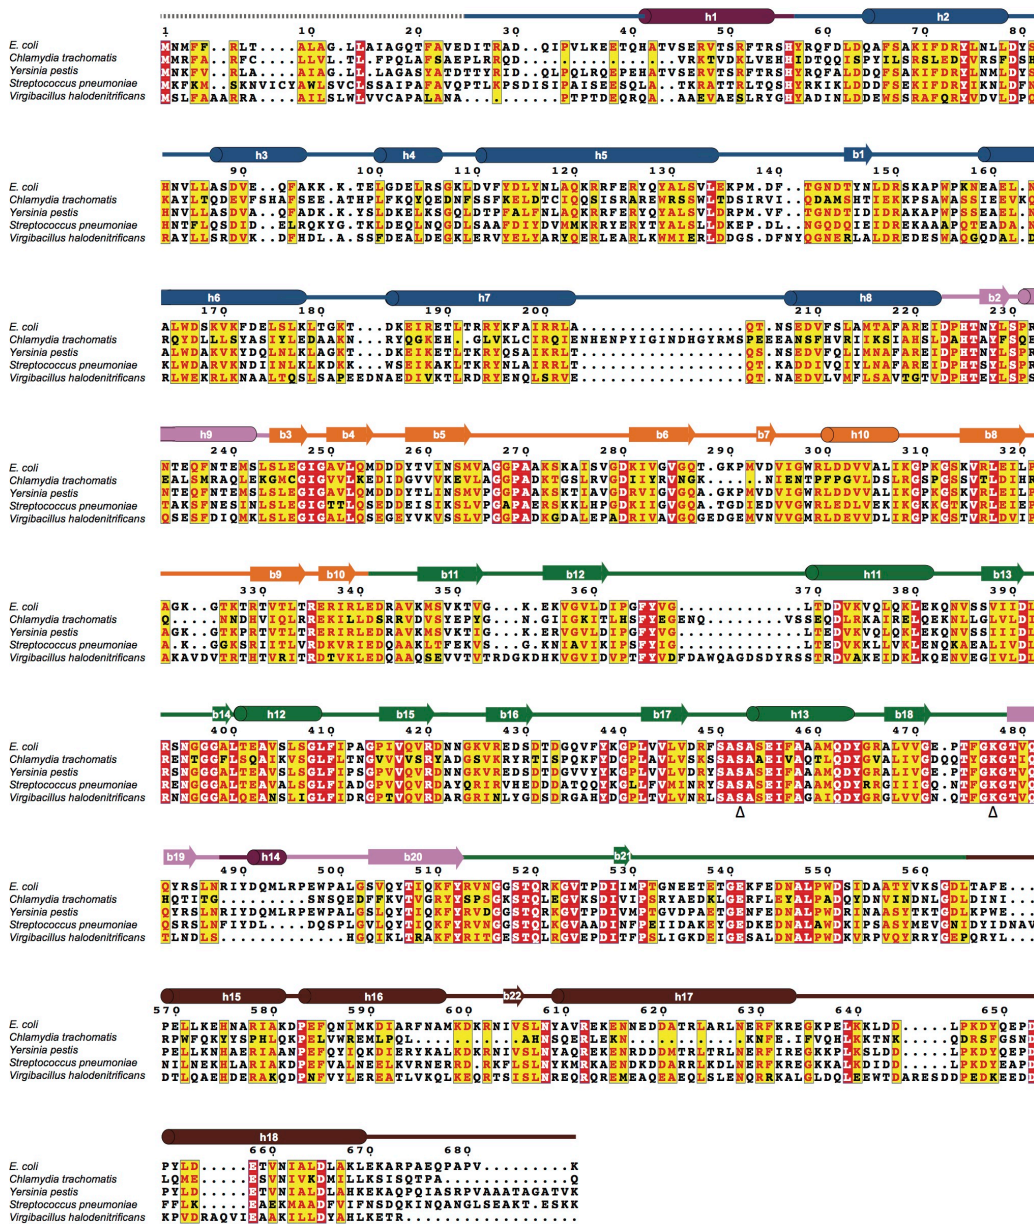

**Supplementary Figure 2: Structure-based multiple sequence alignment of bacterial Prc proteases.** Strictly conserved residues are colored in white and highlighted with red background. Conservatively substituted residues are boxed and colored in red with yellow background. The catalytic residues are indicated by open triangles. The secondary structural elements ( $\alpha$  helices: h;  $\beta$  strands: b) are shown above the aligned sequences and colored in the same scheme as in Fig. 3. Sequences used include *E. coli* Prc (NCBI accession number: NP\_416344.1) and homologues from Gram-negative bacteria including *C. trachomatis* (WP\_009873811.1), *Y. pestis* (WP\_002210848.1) and Gram-positive bacteria including *S. pneumoniae* (CVP79417.1), and *V. halodenitrificans* (CDQ33021.1). The alignment was performed with Expresso and displayed using ESPrnt 3<sup>1,2</sup>.

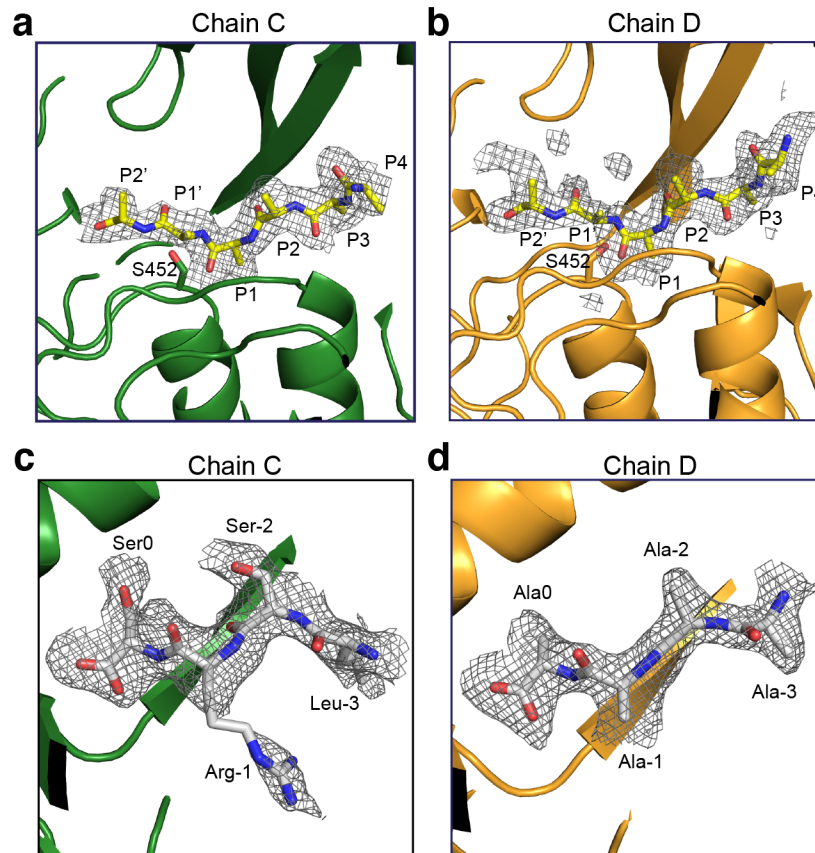

**Supplementary Figure 3: Co-crystallized peptides bound to Prc.** (a-b) Fo-Fc omit map of co-purified peptides bound to the substrate-binding passage, at the proteolytic site in chain C (a) and chain D (b). The catalytic residue S452 is labeled. The peptides were modeled as poly-Ala. The contour level of the map is 2.0  $\sigma$ . (c) Fo-Fc omit electron-density map of the co-purified peptide bound to the PDZ domain in chain C. The peptide was tentatively modeled as LRSR-COOH. The contour level of the map is 1.8  $\sigma$ . (d) Fo-Fc omit map of the co-purified peptide bound to the PDZ domain in chain D. The peptide was tentatively modeled as AAAA-COOH. The contour level of the map is 2.0  $\sigma$ .

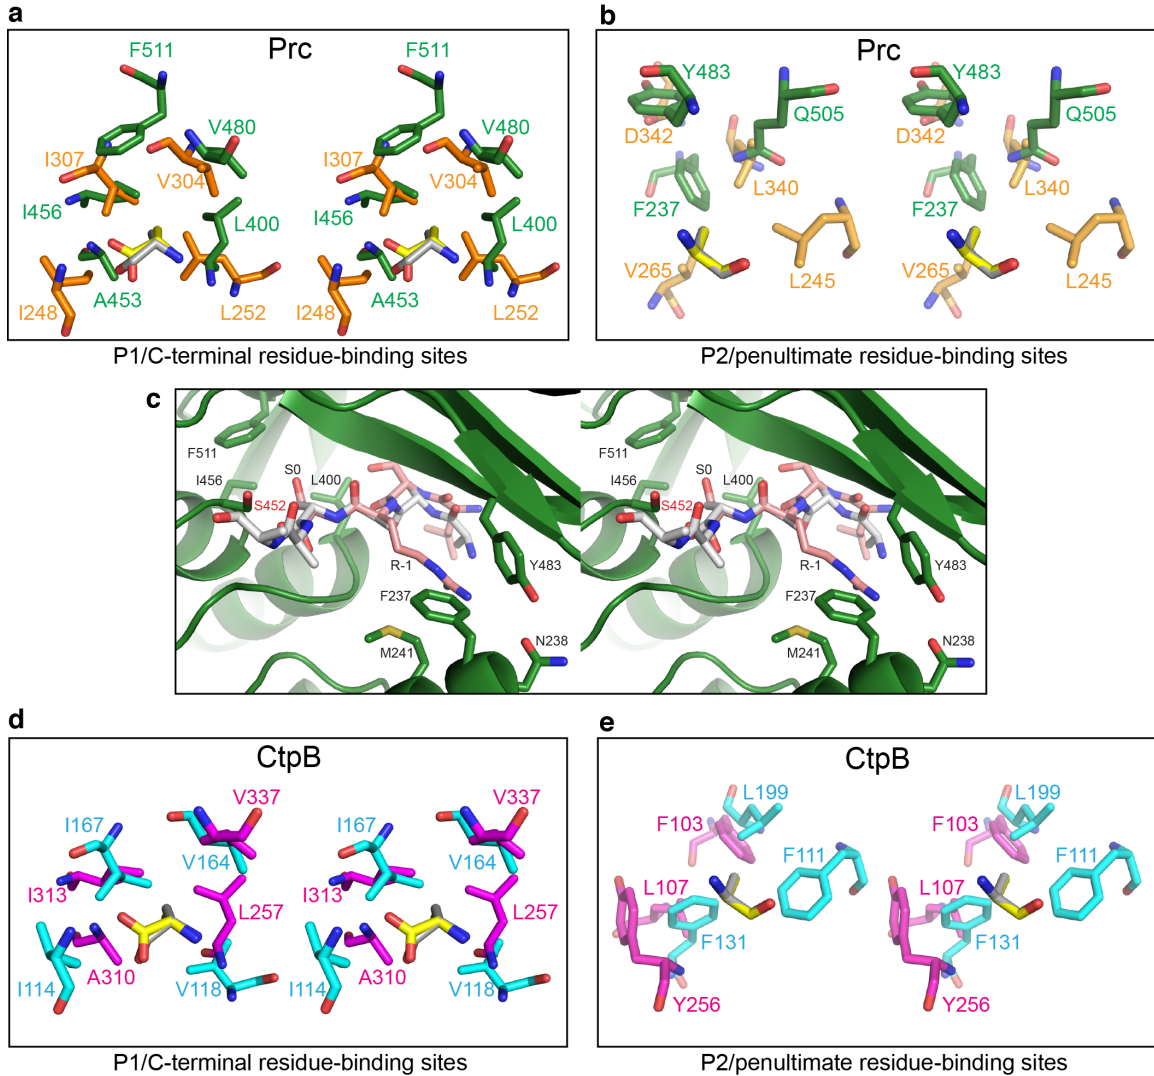

**Supplementary Figure 4: Structural comparison of substrate *versus* PDZ-ligand binding pockets in Prc and CtpB.** (a and b) Structures superimposed of the P1 (grey) with the C-terminal (yellow) residues (a), and of the P2 (grey) and the penultimate (yellow) residues (b) of the peptides bound to the proteolytic active site and the PDZ domain, respectively, of Prc. (c) Structure of the PDZ-binding peptide LRSR-COOH docked to the proteolytic site by superposition with the P1-P2 residues of the bound poly-Ala peptide fragment in Prc (chain C), yielding an r.m.s.d. of 0.34 Å. The catalytic residue S452 is labeled in red. (d and e) Superimposed P1/C-terminal residue binding sites (d) and P2/penultimate residue binding sites (e) in CtpB. The substrate/ligand residues are represented by alanines in sticks for clarity. Residues of the proteolytic and PDZ ligand-binding sites are shown in green and orange sticks, respectively, in Prc (chain C) and in magenta and cyan sticks, respectively, in CtpB.

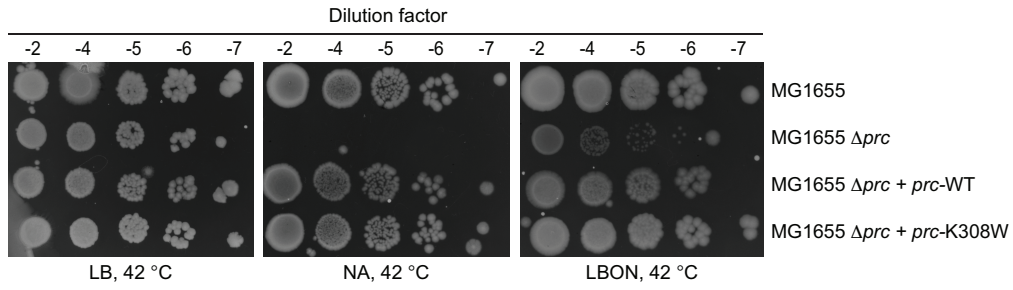

**Supplementary Figure 5: Effect of expressing wild-type Prc and Prc-K308W in  $\Delta prc$  mutant cells.** Cultures of WT MG1655 or MG1655 $\Delta prc$  cells carrying the *prc*-WT or *prc*-K308W plasmids were grown in LB broth with ampicillin and 5  $\mu$ l of various dilutions were spotted on indicated plates and grown overnight.

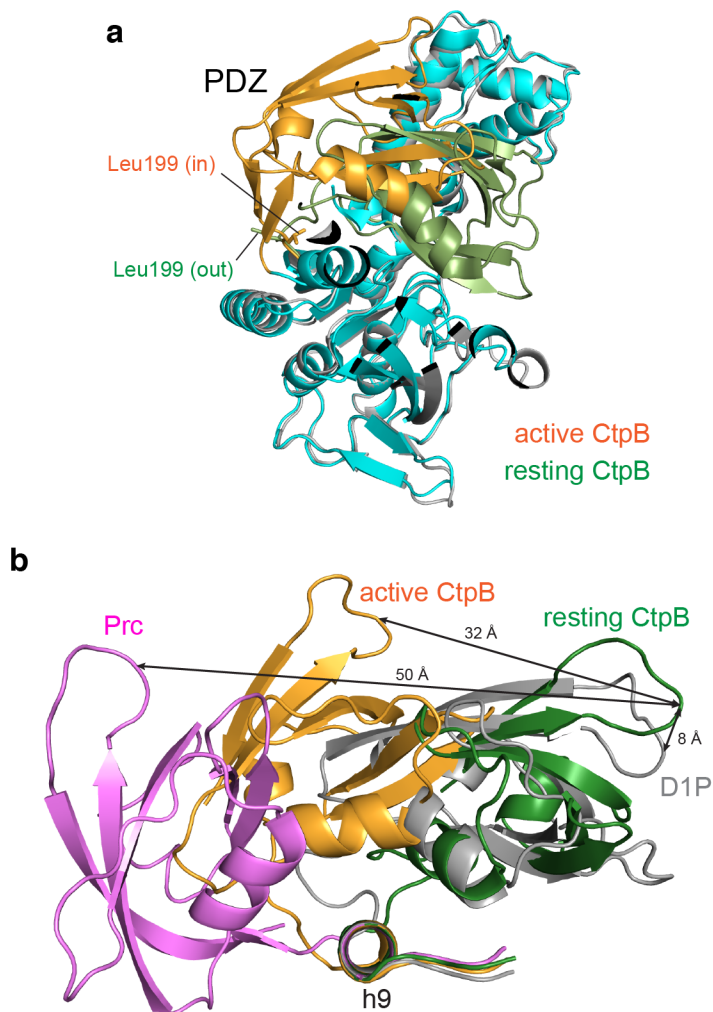

**Supplementary Figure 6: Structural analysis of the PDZ domain in open and closed states.** (a) Cut-away view perpendicular to the substrate passage of the active and resting CtpB structures superimposed based on the protease core showing the distinct “in” and “out” locations, respectively, of L199 (PDB codes 4C2C and 4C2E). The PDZ domains in the resting and active CtpB are colored in green and gold, respectively. (b) Structural superposition based on helix h9 showing the locations of the linked PDZ domains in Prc (chain C; this work), active CtpB, resting CtpB, and D1P (PDB code 1FC7). The distances are measured between the conserved glycine residues in the loops of the homologous PDZ domains.



## SUPPLEMENTARY REFERENCES

1. Armougom, F. et al. Espresso: automatic incorporation of structural information in multiple sequence alignments using 3D-Coffee. *Nucleic Acids Res* **34**, W604-8 (2006).
2. Robert, X. & Gouet, P. Deciphering key features in protein structures with the new ENDscript server. *Nucleic Acids Res* **42**, W320-4 (2014).
